# Supplementary material
Source: publisher site journal article supplement (https://www.dovepress.com/article/269370)
Supplement: Supplementary file 1 [file get_supplementary_file.php]

| **Determinants of Pain Cessation Rate: Multivariable Sensitivity Analysis** | | | |
| --- | --- | --- | --- |
| Characteristic1 | Hazard Ratio | Hazard Ratio 95% Confidence Interval | *p-value* |
| Baseline pain at surgical site (0-10)2 | 0.94 | (0.88-1.00) | 0.05 |
| Self-reported unexpectedly long recovery times from past injuries | 0.65 | (0.4040.96) | 0.029 |
| Trait Anxiety Inventory Score3 | 0.80 | (0.70-0.91) | 0.001 |
| Operation |  |  | <0.0001 |
| Thoracotomy | 0.98 | (0.43-2.20) |  |
| Total Knee Replacement | REF | REF |  |
| Total Hip Replacement | 1.83 | (1.06-3.06) |  |
| Mastectomy | 1.80 | (1.06-3.06) |  |
| Lumpectomy | 6.55 | (3.60-11.92) |  |
| VATS | 2.08 | (1.17-3.71) |  |
| Hand Surgery | 1.55 | (0.86-2.77) |  |
| Carpal Tunnel Surgery | 0.88 | (0.27-2.85) |  |
| Knee Arthroscopy | 2.87 | (1.25-6.62) |  |
| Shoulder Surgery | 17.09 | (5.18-56.41) |  |
| Shoulder Arthroscopy | 0.60 | (0.19-1.92) |  |

**Supplement**

**Table S1.**

1Hazard Ratio units represent the minimal clinically important difference for a given continuous variable.

2Every 1-point increase in the Numeric Pain Rating Scale

3Every 10-point increase in the Trait Anxiety Inventory Score

**Table S2.**

| **Subgroup Analysis for Time to Pain Cessation** |  |
| --- | --- |
| Subgroup | P-value for Interaction |
| Operation * Baseline pain at surgical site | 0.5 |
| Operation * Self-reported unexpectedly long recovery times from past injuries | 0.1 |
| Operation * Trait Anxiety Inventory Score | 0.6 |

**Table S3.**

| **Determinants of Opioid Cessation Rate: Multivariable Sensitivity Analysis** | | | |
| --- | --- | --- | --- |
| Characteristic1 | Hazard Ratio | Hazard Ratio 95% Confidence Interval | *p-value* |
| Past 30-Day Prescription Opioid Use | 0.60 | (0.39-0.92) | 0.02 |
| Beck Depression Inventory-II Score2 | 0.86 | (0.79-0.94) | 0.0008 |
| Treatment Group | | | 0.10 |
| Gabapentin | 1.20 | (0.96-1.50) |  |
| Placebo-Reference |  |  |  |
| Baseline pain other than surgical site (0-10)3 | 0.96 | (0.91-1.01) | 0.11 |
| Operation |  |  | <0.0001 |
| Thoracotomy | 0.86 | (0.43-1.70) |  |
| Total Knee Replacement | REF | REF |  |
| Total Hip Replacement | 1.45 | (1.09-1.91) |  |
| Mastectomy | 2.58 | (1.74-3.83) |  |
| Lumpectomy | 10.44 | (6.63-16.42) |  |
| VATS | 2.81 | (1.80-4.38) |  |
| Hand Surgery | 2.80 | (1.70-4.59) |  |
| Carpal Tunnel Surgery | 12.44 | (4.93-31.35) |  |
| Knee Arthroscopy | 7.56 | (3.42-16.73) |  |
| Shoulder Surgery | 21.00 | (6.42-68.05) |  |
| Shoulder Arthroscopy | 2.64 | (1.044-6.68) |  |

1Hazard Ratio units represent the minimal clinically important difference for a given continuous variable.

2Every 5-point increase in the Beck Depression Inventory-II Score

3Every 1-point increase in the Numeric Pain Rating Scale

**Table S4.**

| **Subgroup Analysis for Time to Opioid Cessation and Beck Depression Inventory-II Score** | | |
| --- | --- | --- |
| Subgroup | Hazard Ratio (95%CI)1 | P-value for Interaction |
| Operation |  | >0.05 |
| Thoracotomy | 0.41 (0.18-0.95) |  |
| Total Knee Replacement | 0.86 (0.74-0.99) |  |
| Total Hip Replacement | 0.83 (0.71-0.96) |  |
| Mastectomy | 0.95 (0.73-1.23) |  |
| Lumpectomy | 1.14 (0.86-1.52) |  |
| VATS | 0.71 (0.47-1.07) |  |
| Hand Surgery | 1.13 (0.73-1.75) |  |
| Carpal Tunnel Surgery | 1.31 (0.74-2.31) |  |
| Knee Arthroscopy | 0.44 (0.08-2.52) |  |
| Shoulder Surgery | 0.79 (0.22-2.84) |  |
| Shoulder Arthroscopy | 0.50 (0.32-0.77) |  |

1Based on every 5-point increase in the Beck Depression Inventory -II Score

**Table S5.**

| **Subgroup Analysis for Time to Opioid Cessation and Past 30-Day Prescription Opioid Use** | | |
| --- | --- | --- |
| Subgroup | Hazard Ratio (95%CI) | P-value for Interaction |
| Operation |  | 0.004 |
| Thoracotomy | 0.66 (0.08-5.15) |  |
| Total Knee Replacement | 0.39 (0.19-0.80) |  |
| Total Hip Replacement | 0.44 (0.20-0.96) |  |
| Mastectomy | 0.61 (0.19-1.99) |  |
| Lumpectomy | 7.20 (2.03-25.05) |  |
| VATS | 1.93 (0.26-14.32) |  |
| Hand Surgery | 0.64 (0.15-2.77) |  |
| Carpal Tunnel Surgery | 0.39 (0.19-0.80) |  |
| Knee Arthroscopy | 0.39 (0.19-0.80) |  |
| Shoulder Surgery | 0.30 (0.19-0.80) |  |
| Shoulder Arthroscopy | 4.81 (0.53-43.66) |  |
